# Supplementary material for: Alkali metal salts of formazanate ligands: diverse coordination modes as a result of the nitrogen-rich [NNCNN] ligand backbone
Source: Royal Society of Chemistry journal article supplement (doi:10.1039/c4dt02578d), 2014-01-01

## Supporting Information to

### **Alkali metal salts of formazanate ligands: diverse coordination modes as a result of the nitrogen-rich [NNCNN] ligand backbone**

**Raquel Travieso-Puente, Mu-Chieh Chang and Edwin Otten**

# NMR spectra for 1-K at -25 °C in THF-*d*<sub>8</sub>

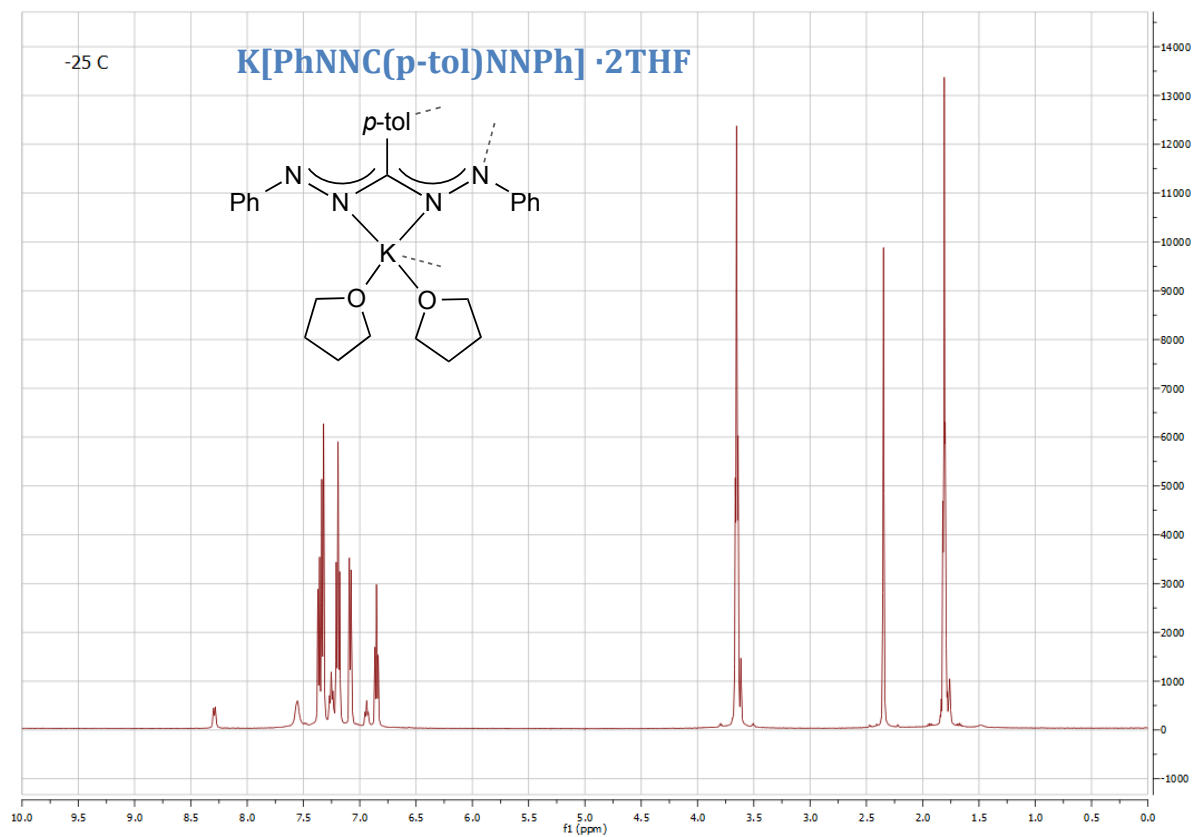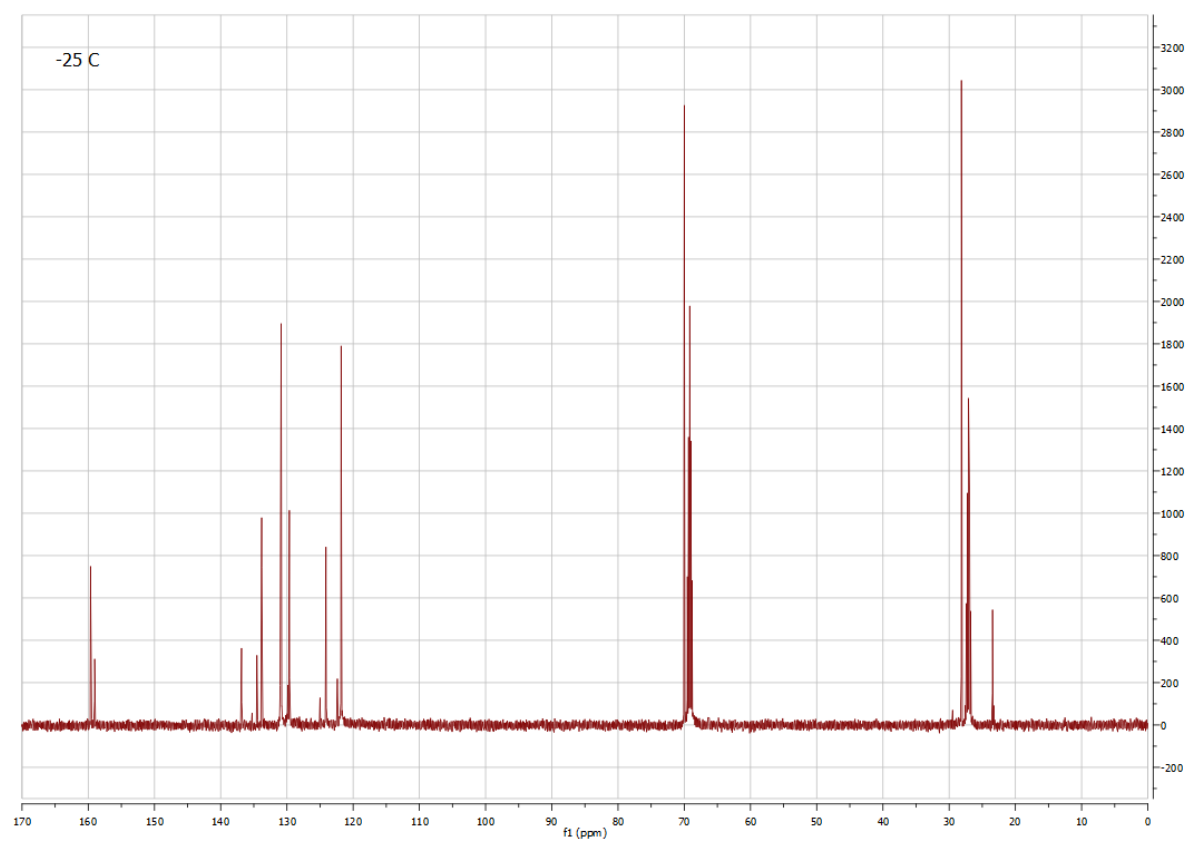

-25C, COSY

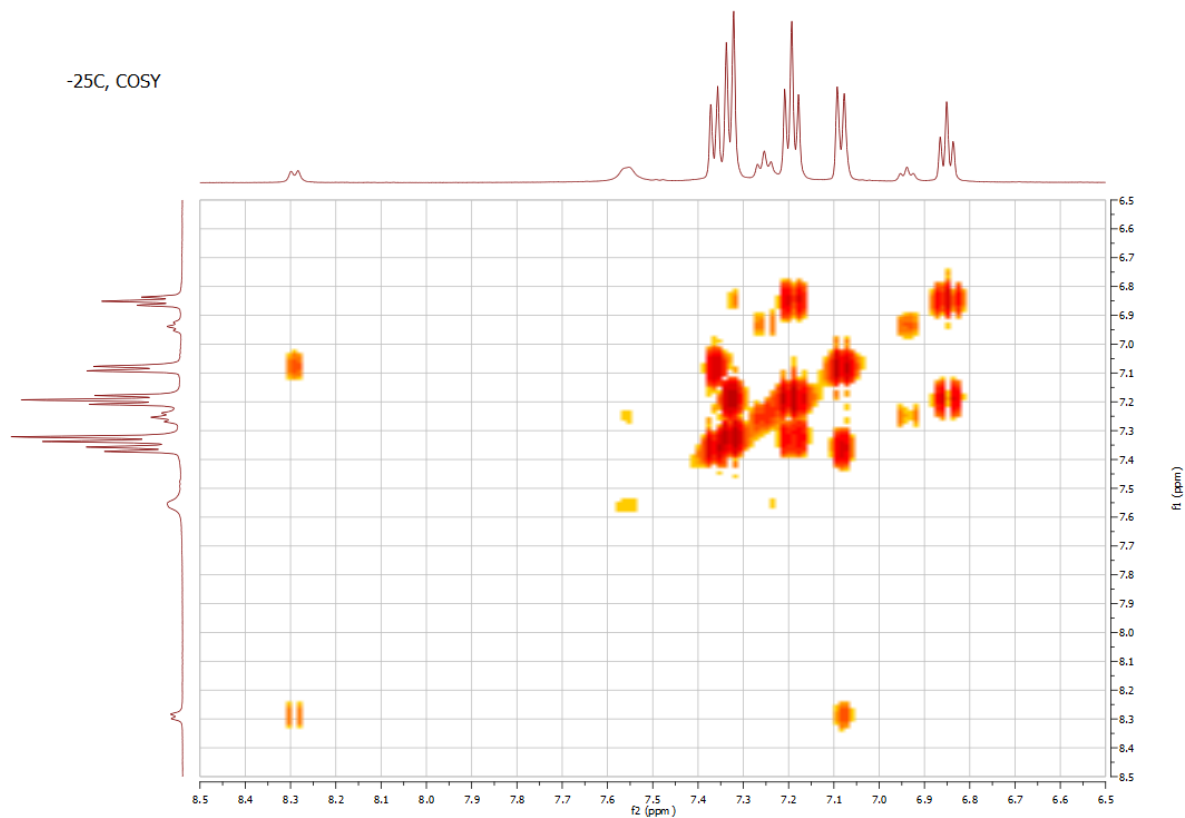

-25 C, EXSY

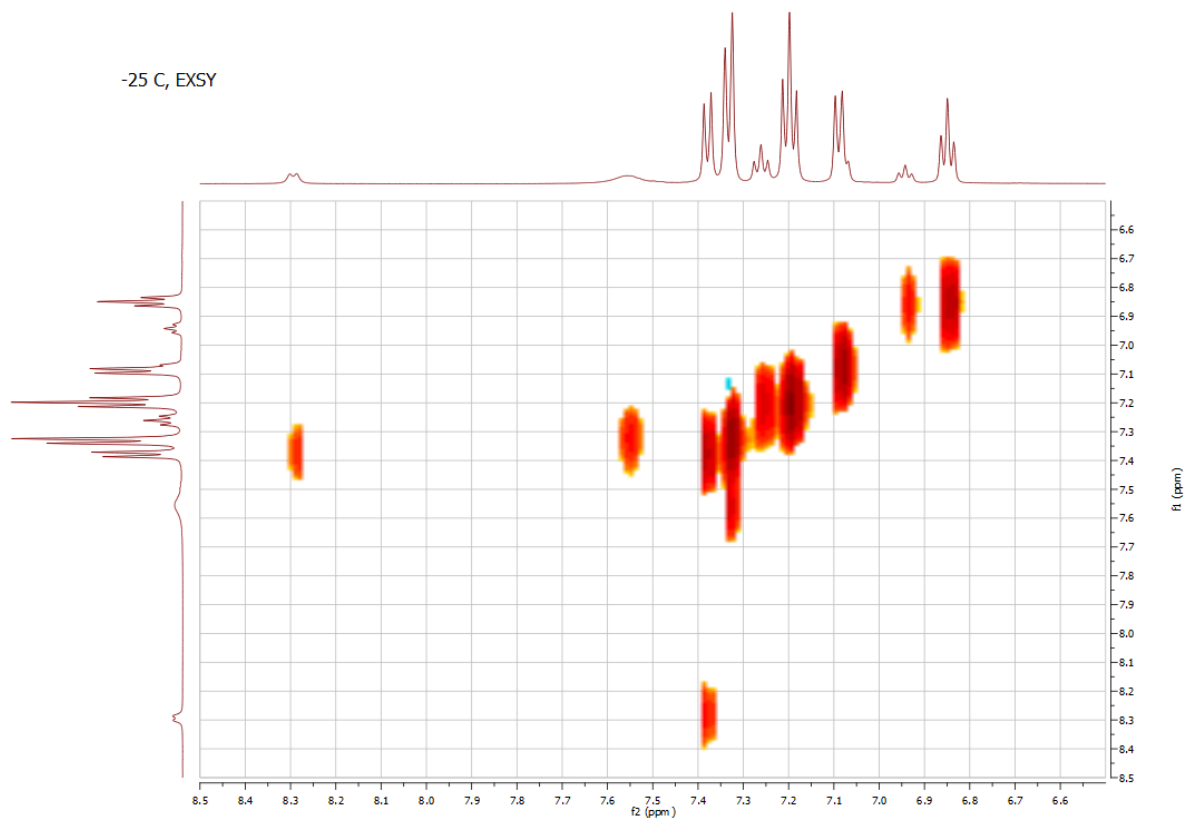

# NMR spectra for 2-K at 25 °C in THF-*d*<sub>8</sub>

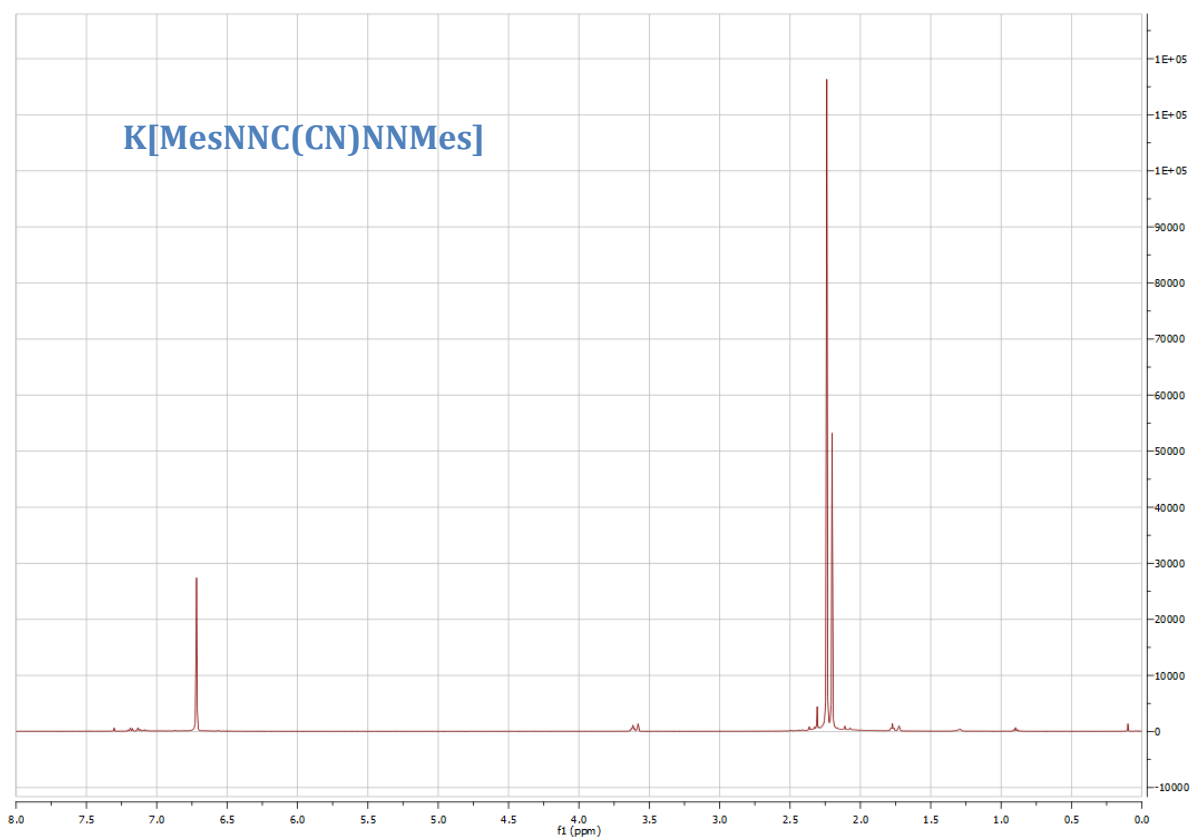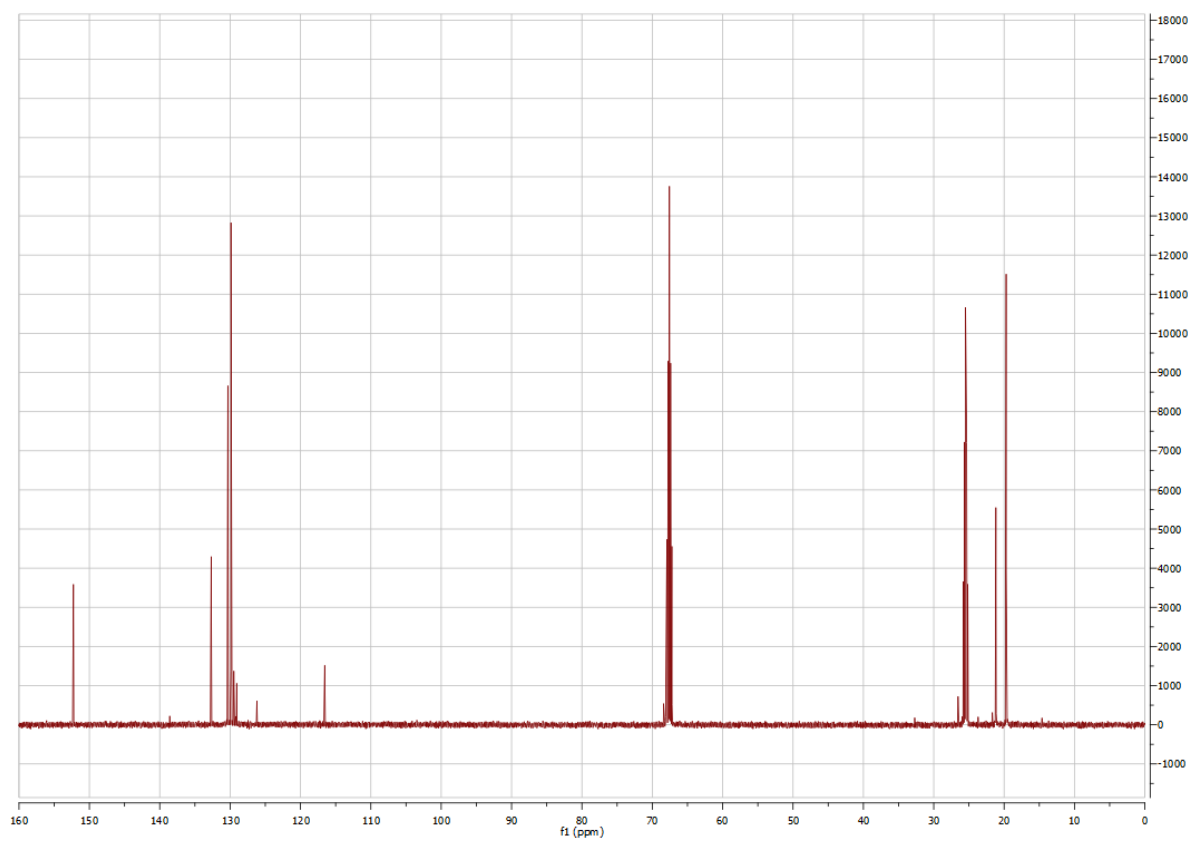

# NMR spectra for 2-Na at 25 °C in THF-*d*<sub>8</sub>

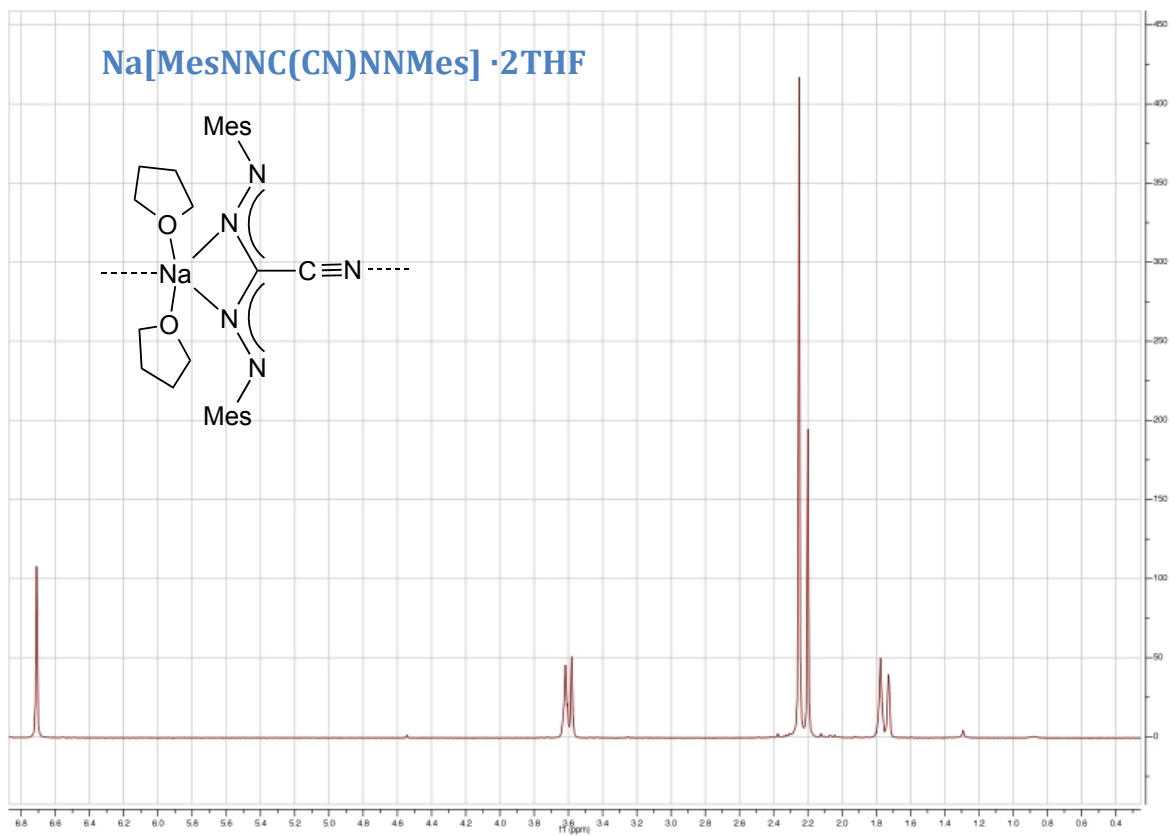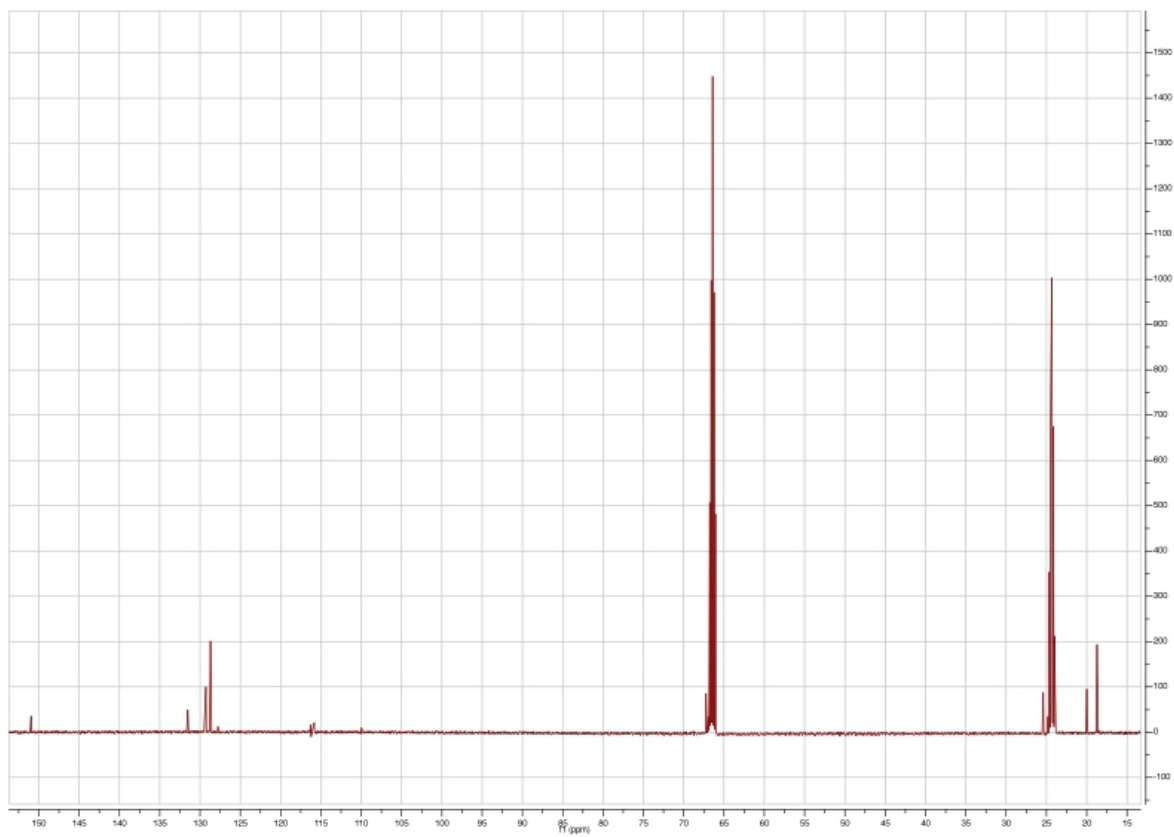

# NMR spectra for 3-Na<sub>THF</sub> at 25 °C in THF-*d*<sub>8</sub>

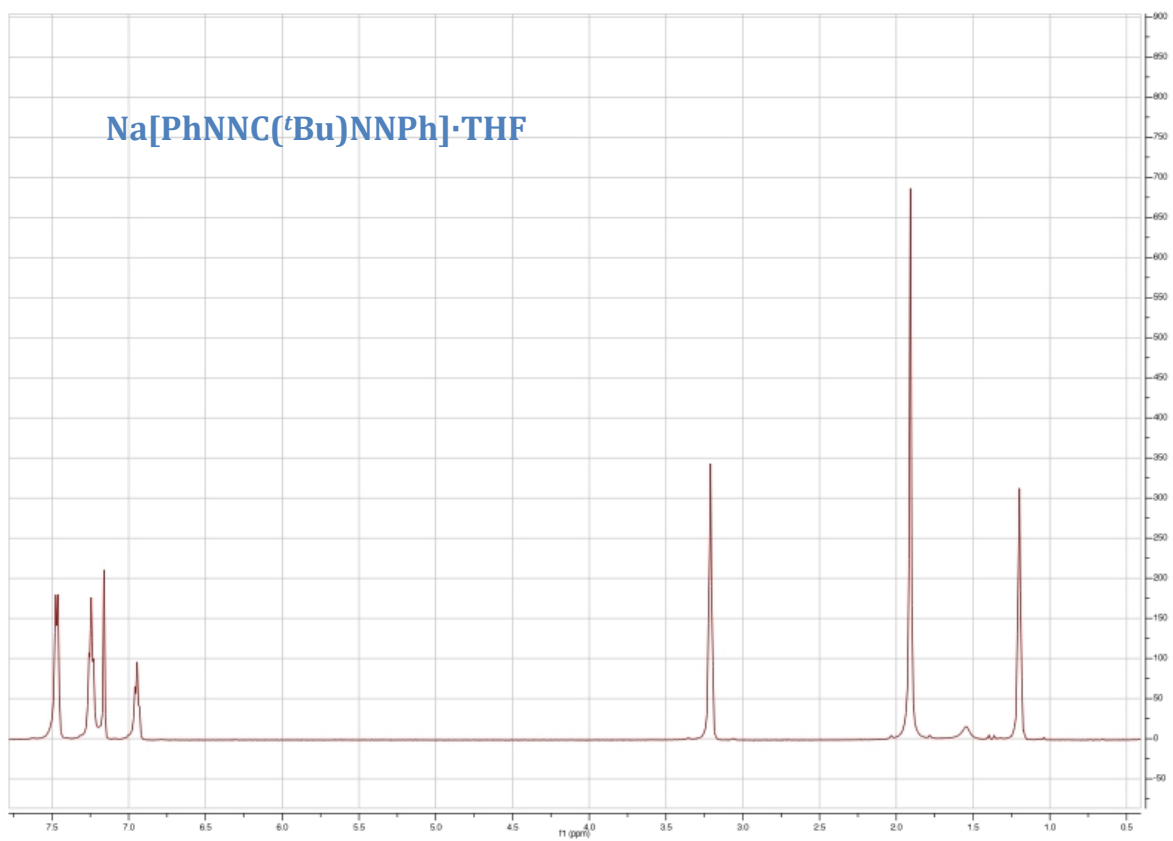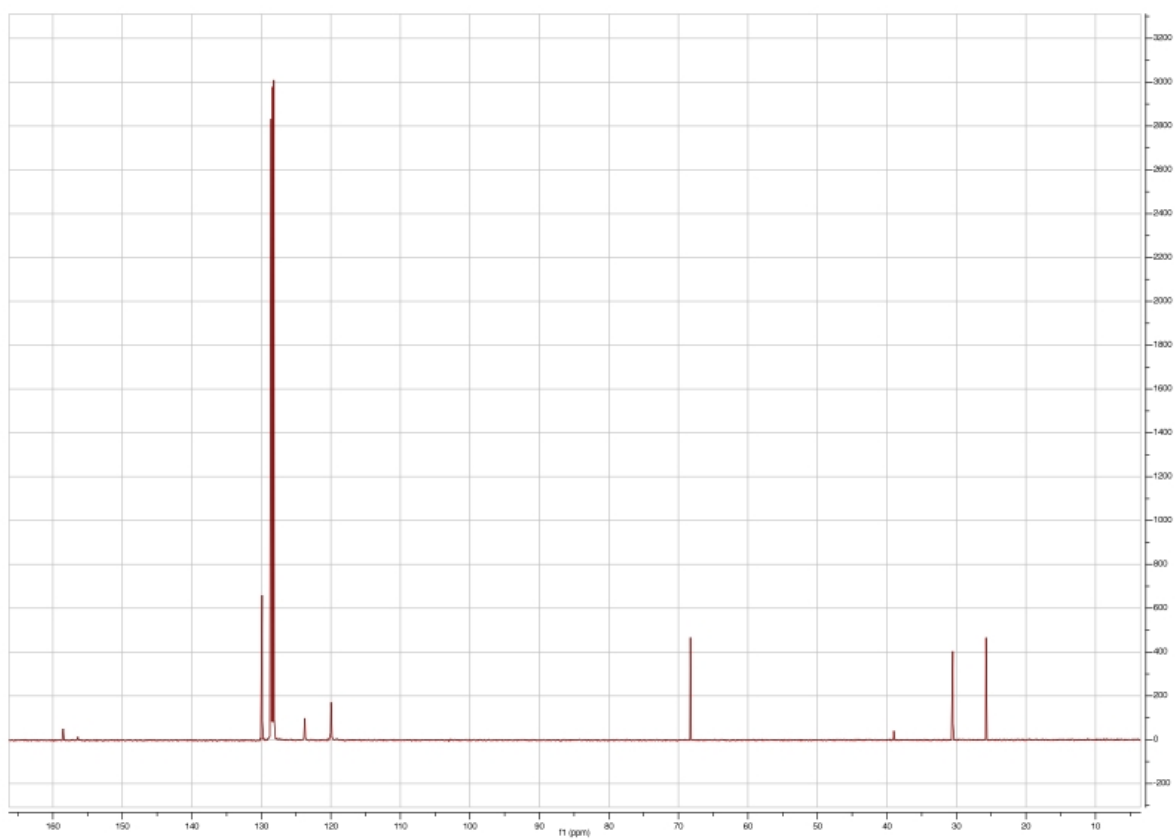

$^1\text{H}$  NMR spectrum for 3-Na at 25 °C in  $\text{C}_6\text{D}_6$

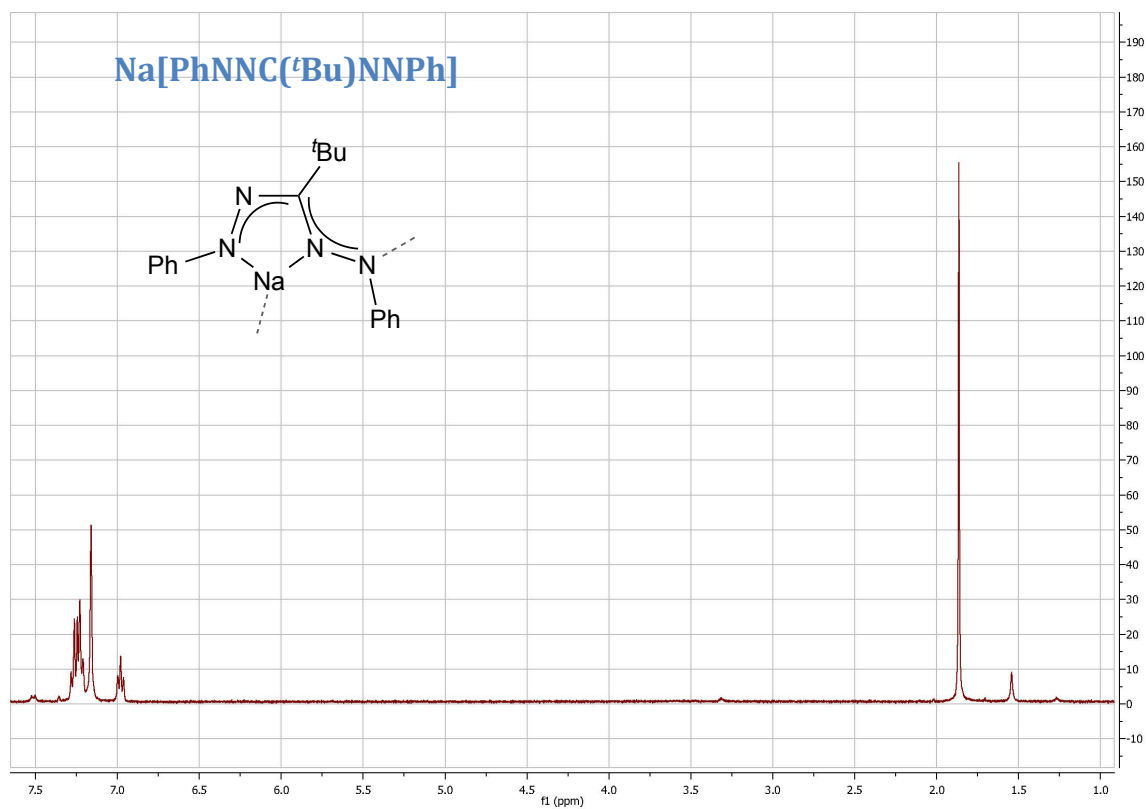

# NMR spectra for 1-Bu<sub>4</sub>N at 25 °C in THF-d<sub>8</sub>

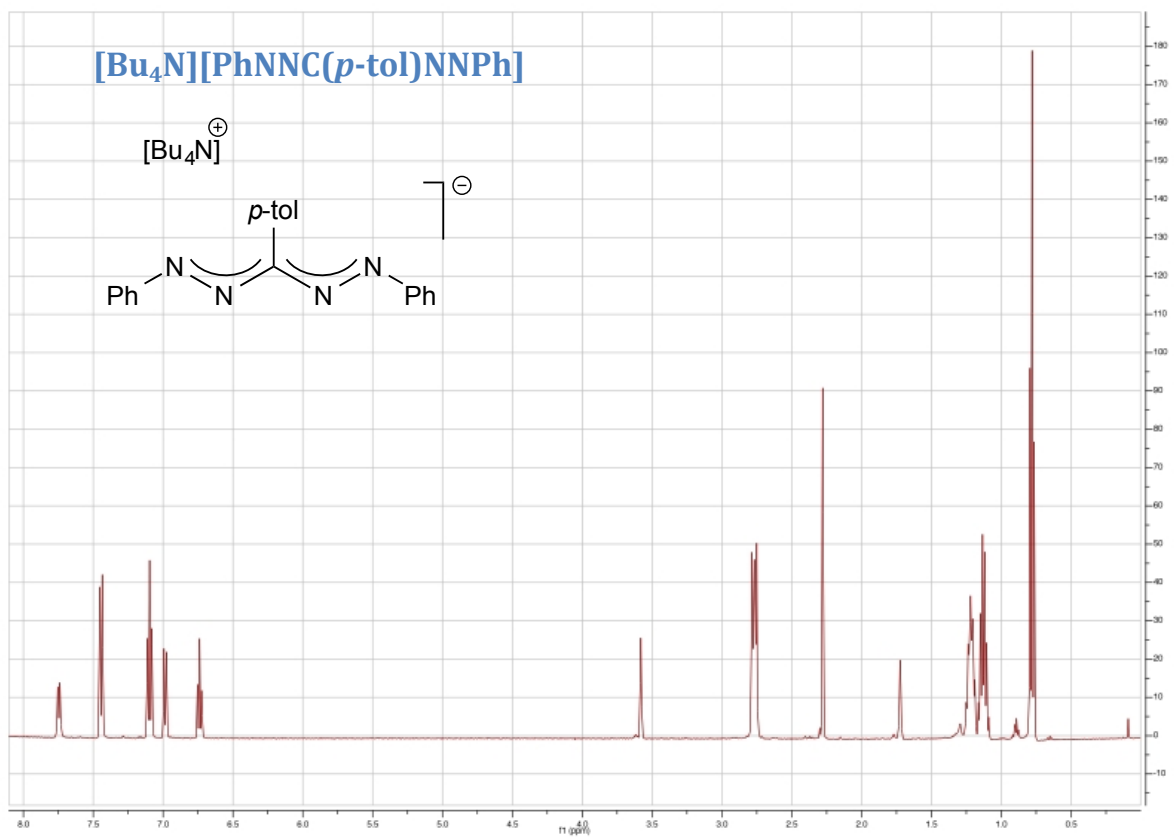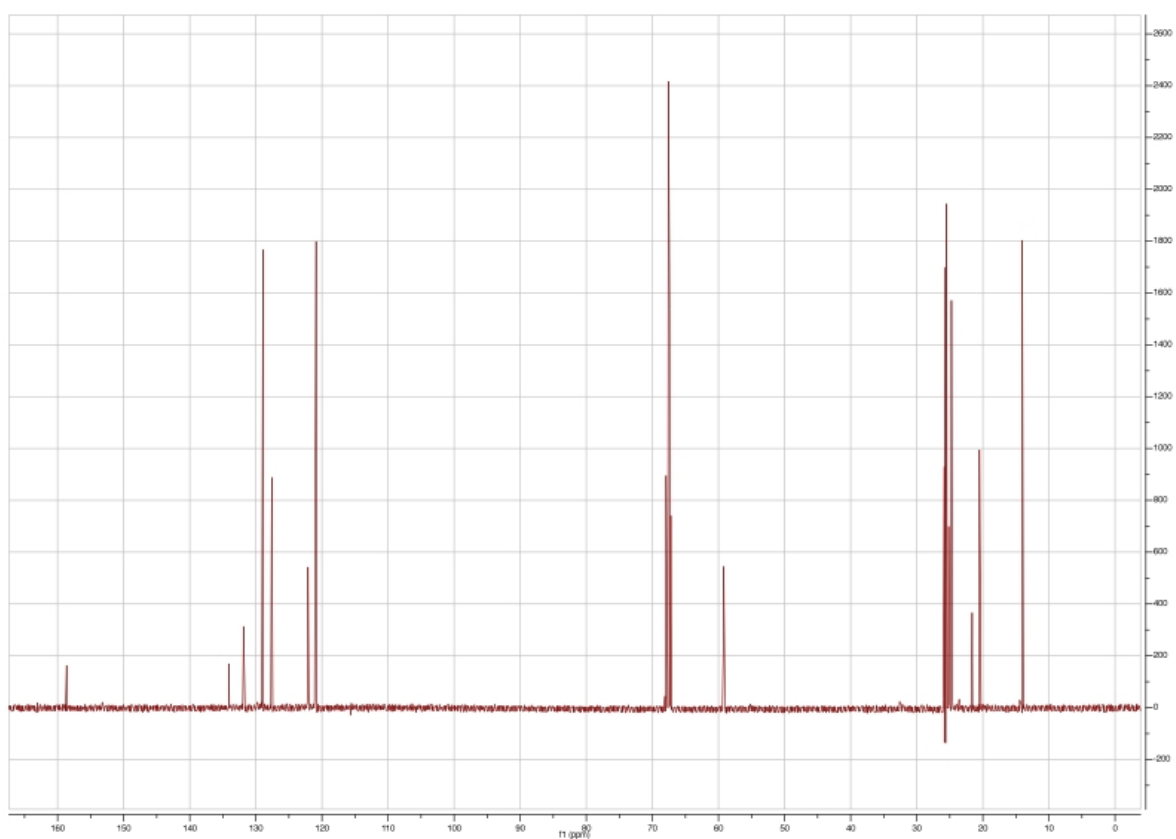

Supplement: c4dt02578d1.pdf [file c4dt02578d1.pdf]
